# Supplementary material for: Microwave assisted synthesis of α-Fe2O3/reduced graphene oxide as anode material for high performance lithium ion batteries
Source: Royal Society of Chemistry journal article supplement (doi:10.1039/c5nj01480h), 2015-01-01
Supplement: c5nj01480h1.pdf [file c5nj01480h1.pdf]

Electronic Supplementary Information (ESI) for New Journal of Chemistry

This journal is © The Royal Society of Chemistry

## **Microwave Assisted Synthesis $\alpha$ -Fe<sub>2</sub>O<sub>3</sub>/Reduced Graphene Oxide as Anode Materials for High Performance Lithium Ion Batteries**

Shoupu Zhu, Ming Chen, Wenji Ren, Jiren Yang, Shanshan Qu, zhongcui Li and Guowang Diao\*

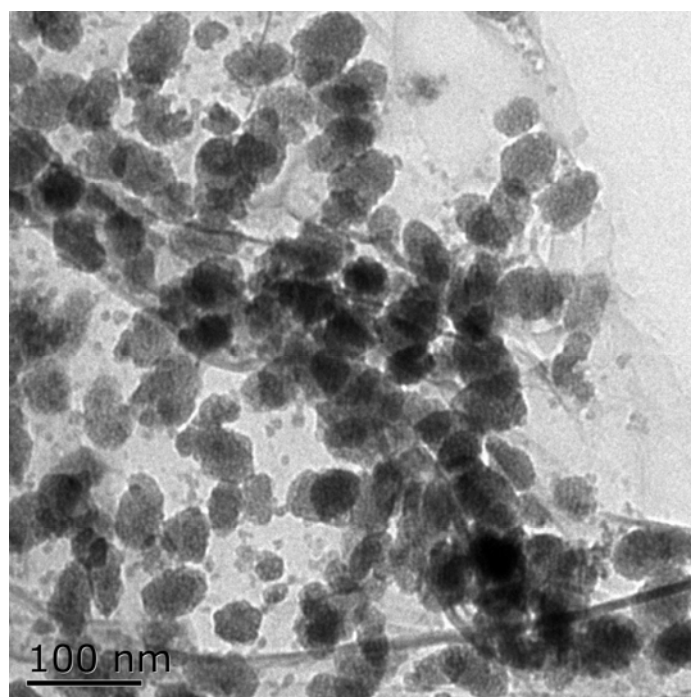

Fig. S1 The TEM image of  $\alpha$ -Fe<sub>2</sub>O<sub>3</sub>/RGO nanocomposites after 50 charge-discharge cycles at a current density of 0.5 A·g<sup>-1</sup>.
